# Supplementary material for: Health Status and Access to Healthcare for Uninsured Migrants in Germany: A Qualitative Study on the Involvement of Public Authorities in Nine Cities
Source: Int J Environ Res Public Health. 2022 May 28;19(11):6613. doi: 10.3390/ijerph19116613 (PMC9180213; doi:10.3390/ijerph19116613)

Supplementary File S1 : Interview guide German original and English courtesy translation, reproduced for publication. (Version 2, 07/2017)

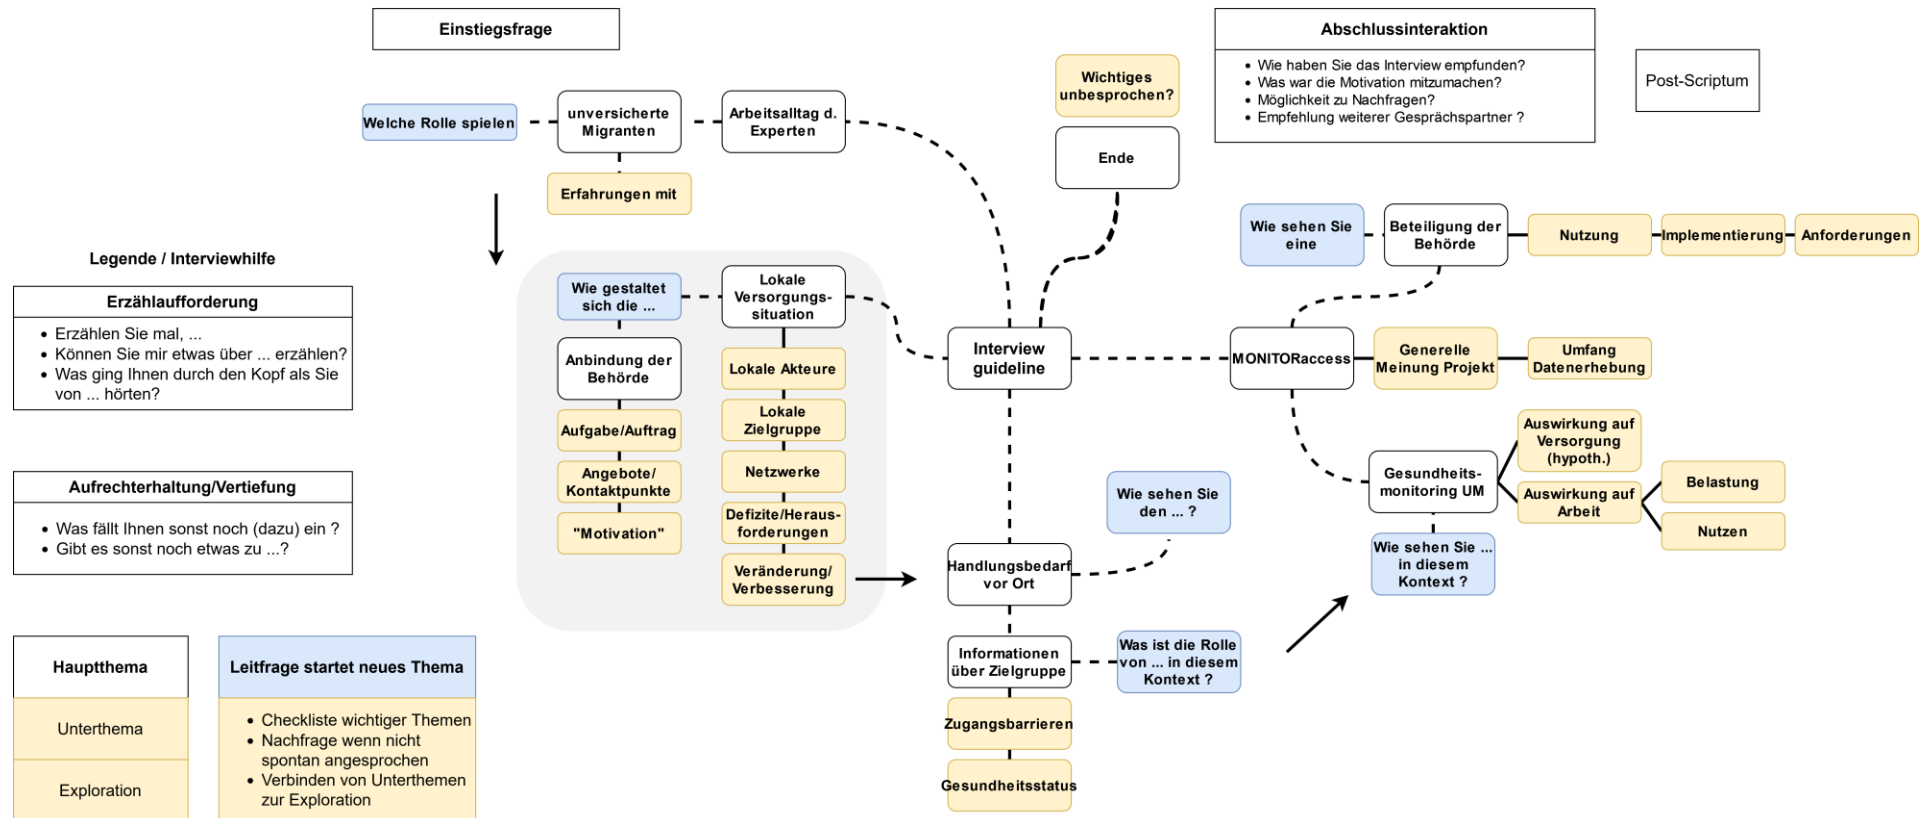

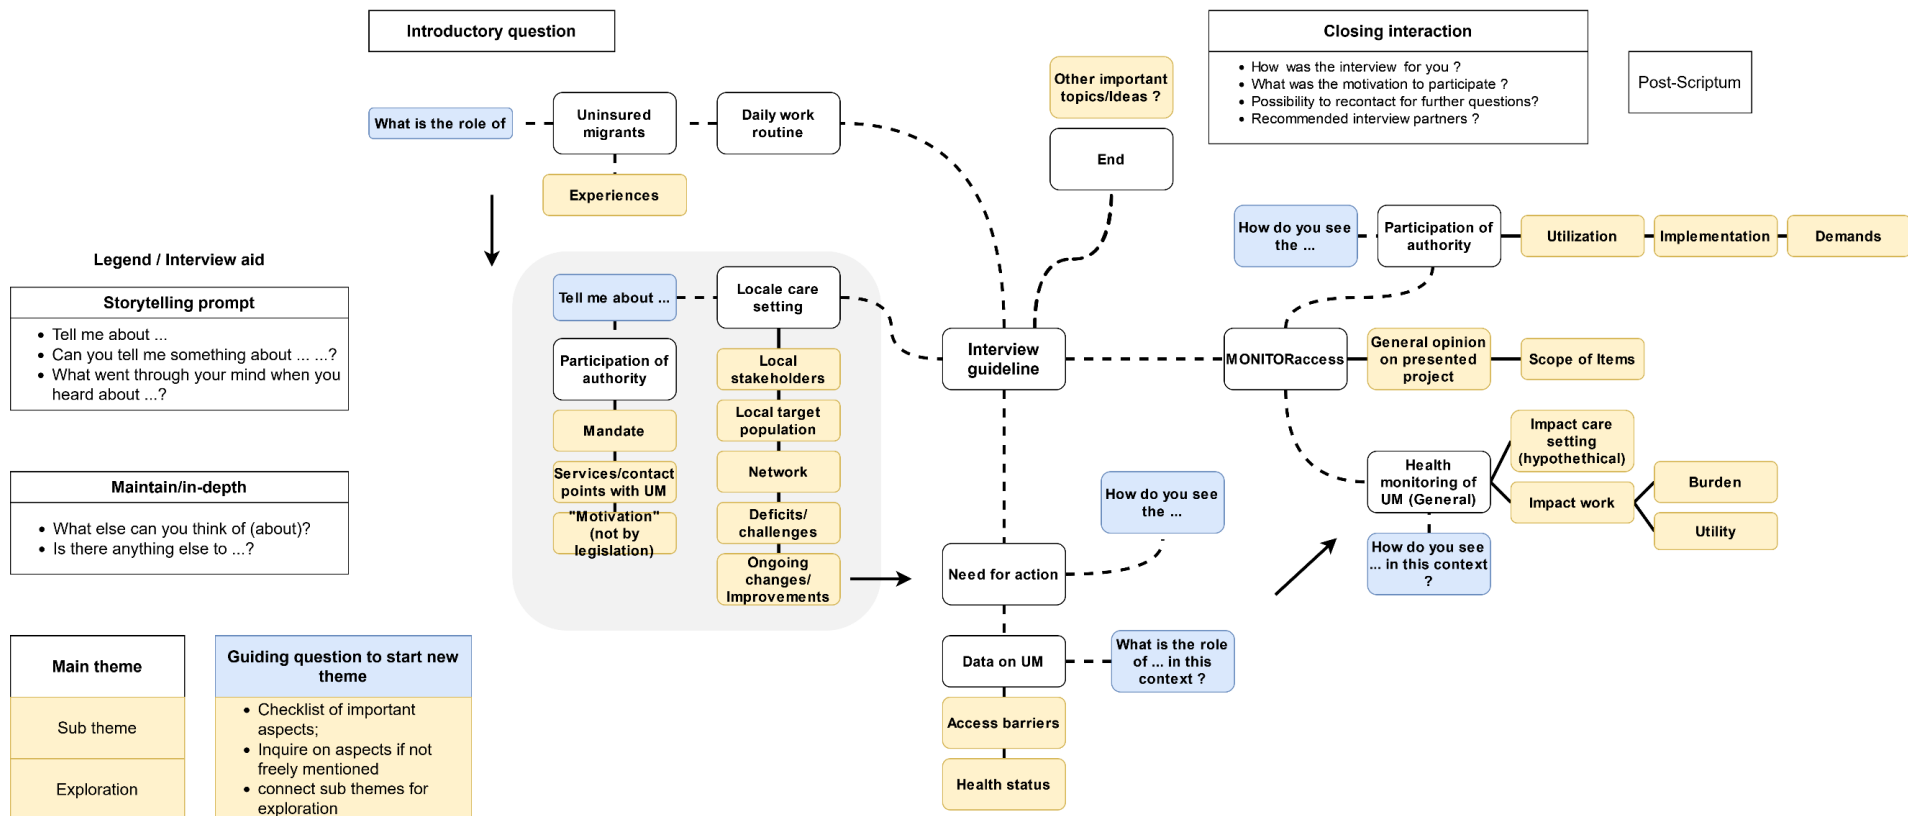

Supplement: Supplementary file 1 [file ijerph-19-06613-s001.zip › Supplementary File S1 Interview Guide German and English version 11-04-2022.pdf]
