# Supplementary material for: Health Status and Access to Healthcare for Uninsured Migrants in Germany: A Qualitative Study on the Involvement of Public Authorities in Nine Cities
Source: Int J Environ Res Public Health. 2022 May 28;19(11):6613. doi: 10.3390/ijerph19116613 (PMC9180213; doi:10.3390/ijerph19116613)
Supplement: Supplementary file 1 [file ijerph-19-06613-s001.zip › Supplementary File S2_Data table, illustrating the reductive content analysis and the inductive-deductive code framework .pdf]

Supplementary File S2 : Data table, illustrating the reductive content analysis

|                               |                                                                                                                                                                                                                     |
|-------------------------------|---------------------------------------------------------------------------------------------------------------------------------------------------------------------------------------------------------------------|
| Abbreviations and explanation |                                                                                                                                                                                                                     |
| Document                      | File name of the audio file transcript                                                                                                                                                                              |
| Start                         | Start of quote in the audio file transcript                                                                                                                                                                         |
| Code                          | Code name of the quote                                                                                                                                                                                              |
| End                           | End of the quote in the audio file transcript                                                                                                                                                                       |
| Segment                       | Quoted segment                                                                                                                                                                                                      |
| SUMMARIZATION                 | Short summarization of the quote to expose the analyzed content according to the applied code                                                                                                                       |
| CASE                          | Commentary on the analyzation on case level                                                                                                                                                                         |
| INTERCASE                     | Commentary on the analyzation on comparison between cases in the sample                                                                                                                                             |
| ANNOTATION                    | Information that were researched and added for the analysis when contet was not clear from the interview. We can not expose these sources as they enable the recognition of individual public authorities and exper |
| Capitalized Themes            | Main topics in capital letters have been noted in the SUMMARIZATION column for better finding                                                                                                                       |
| LPHA                          | Local publich health authority/authorities                                                                                                                                                                          |
| SSO                           | Social security office/offices                                                                                                                                                                                      |
| NGO(s)                        | Non-governmental organization(s)                                                                                                                                                                                    |
| P1, P2 etc                    | Interviewpartner 1, Interviewpartner 2; In interview 7 we have named the two interviewpartners P71 and P72                                                                                                          |
| Codes:                        | We have noted a summary of the code framework on Spread sheet 2 "Code Framework"                                                                                                                                    |
| BLANK                         | We have blanked out certain excerpts to preserve anonymity of authorities and experts for this publication                                                                                                          |

Exemplary courtesy translation of 5 segments from the original data table for illustration of research process

| Document           | Start | Code                                                                               | End | Segment                                                                                                                                                                                                                                                                                                                                                                                                                                                                                                                                                                                                                                                                                                                                                                                                                                                                                                                                                                                                                                                                                                                         | SUMMARIZATION                                                                                                                                                                                                                                                                                                                                        | CASE                                                                                                                                                                    | INTERCASE                                                                                                                                                                       |
|--------------------|-------|------------------------------------------------------------------------------------|-----|---------------------------------------------------------------------------------------------------------------------------------------------------------------------------------------------------------------------------------------------------------------------------------------------------------------------------------------------------------------------------------------------------------------------------------------------------------------------------------------------------------------------------------------------------------------------------------------------------------------------------------------------------------------------------------------------------------------------------------------------------------------------------------------------------------------------------------------------------------------------------------------------------------------------------------------------------------------------------------------------------------------------------------------------------------------------------------------------------------------------------------|------------------------------------------------------------------------------------------------------------------------------------------------------------------------------------------------------------------------------------------------------------------------------------------------------------------------------------------------------|-------------------------------------------------------------------------------------------------------------------------------------------------------------------------|---------------------------------------------------------------------------------------------------------------------------------------------------------------------------------|
| Interview Audio 04 |       | 602 ANBUNDUNG BEHOERDE (INVOLVEMENT OF AUTHORITY)                                  | 6   | The authority here as such, i.e. a social authority itself, the topic is actually only located here in our department. Apart from that, we have health assistance for social welfare recipients, we have health management for asylum seekers. Otherwise, such topics, including people without health insurance, access to health care, health insurance law, are all located in the areas of the health authority. We are a bit of a lone wolf here - as far as health issues are concerned, I'd say.                                                                                                                                                                                                                                                                                                                                                                                                                                                                                                                                                                                                                         | The topic is a marginal topic in the social authority                                                                                                                                                                                                                                                                                                | Ultimately, the topic is only explicitly located with the expert                                                                                                        | Smilar to P11                                                                                                                                                                   |
| Interview Audio 02 |       | 802 ANBUNDUNG BEHOERDE (INVOLVEMENT OF AUTHORITY)\ "Runder Tisch" ("Round table")  | 8   | Well, for about a year now I've wanted to have a round table with all the hospitals, with the youth welfare office and with the outpatient providers of care for people without health insurance. For people without health insurance. It is a very political topic, when I started my job one and a half years ago, I first interviewed all 16 hospitals in [town]. The social workers, the patient administration and, if they had time, the management. What are the problems? From the different.. social workers see it differently than the patient administrators and the and billing and exactly what kind of difficulties there are, how long hospitalisation there are, how long the waiting times are, how much there are costs that they are stuck with, what the difficulties are and qualitative examples. And I summarised that in a short report, which was - yes, change of department etc. long political - yes, it was then sent around and I am actually waiting, yes, we have been trying to set up a round table since the beginning of these years. It's just taking a while until it can be set up now. | NETWORK : Round Table : The expert is in the process of setting up a "round table" with representatives of all hospitals, the youth and social and social services and with the outpatient providers of care for people without health insurance. The occasion is her survey of hospitals on the challenge of inpatient care for uninsured patients. | Inpatient needs are a challenge according to the expert. Planned participants : Representatives of all hospitals, social services, outpatient outpatient contact points | Inpatient needs are generally a more frequently mentioned challenge. cf VERSORGUNGSSITUATION (CARE SITUATION)                                                                   |
| Interview Audio 02 |       | 802 ANBUNDUNG BEHOERDE (INVOLVEMENT OF AUTHORITY)\ "Runder Tisch" ("Round table")  | 8   | So that was another initiative at the outpatient level, the other one more inpatient with the round table                                                                                                                                                                                                                                                                                                                                                                                                                                                                                                                                                                                                                                                                                                                                                                                                                                                                                                                                                                                                                       | NETWORK : round table : The round table refers to inpatient needs of uninsured people.                                                                                                                                                                                                                                                               |                                                                                                                                                                         | Round table mentioned in several cases, always interdisciplinary and inter-institutional, concerns and institutions represented vary (NGOs-LPHA-SSO)                            |
| Interview Audio 06 |       | 802 ANBUNDUNG BEHOERDE (INVOLVEMENT OF AUTHORITY)\ "Runder Tisch" ("Round table")  | 8   | The South Eastern Europe Working Group, which is based here in the city administration, is also made up of various specialist areas and external cooperation partners. It has to do with the fact that [the town] has a very high proportion of South-Eastern European immigrants, which is really very high, and they are very often not insured. But they are also a difficult target group, so even when their needs are identified, they suddenly disappear again. Which then of course raises the issue of measures and what resources you then put in to do something for the group is a bit difficult, because you can never really plan it.                                                                                                                                                                                                                                                                                                                                                                                                                                                                             | Round table of health authority, NGO, regulatory authorities (ANNOTATION 4)                                                                                                                                                                                                                                                                          | Focus on EU citizens in the the working group; The high mobility of the target group is mentioned ("difficult, planning uncertainty")                                   | The high mobility in reality is also mentioned by other experts, the working group is problem-oriented (health/social/legal) vs "pluri-local" realities of life (Eichler 2008). |
| Interview Audio 06 |       | 4002 ANBUNDUNG BEHOERDE (INVOLVEMENT OF AUTHORITY)\ "Runder Tisch" ("Round table") | 40  | Because if I remember correctly, we had a meeting some time ago with the health conference in the steering committee and our health policy spokespersons. That is, from the parliamentary groups in the municipal council. This is a round table that we want to establish on a regular basis so that we can bring together experts and politicians, so to speak, because we actually work together and they need to know what makes them tick and what is going on with us and what the state of affairs on our side                                                                                                                                                                                                                                                                                                                                                                                                                                                                                                                                                                                                           | NETWORK: Round Table: Here is an example of a composition of administrative experts and politicians.                                                                                                                                                                                                                                                 | "We actually work together and they need to know what makes them tick and what is going on with us and what are the state of affairs with us" Conversely, there tends   | Cf. P10 and P11: active exchange with decision-makers, at least example of project drafts being proactively drafted by public authorities                                       |

| CODE                            | DESCRIPTION                                                                                                                                                                                                                                                                                                            | INDUCTIV | DEDUCTIV |
|---------------------------------|------------------------------------------------------------------------------------------------------------------------------------------------------------------------------------------------------------------------------------------------------------------------------------------------------------------------|----------|----------|
| <b>02 ANBINDUNG BEHOERDE</b>    |                                                                                                                                                                                                                                                                                                                        | x        |          |
|                                 | Alle Aussagen bzgl. einer Anbindung der Behörde an die Versorgungssituation (Direkt, indirekt, Netzwerke).                                                                                                                                                                                                             |          |          |
| "Runder Tisch"                  | Erwähnung von Gremium oder Treffen mit Regelmässigkeit von Akteuren. Mehrere Behörden, oder mit NGO oder anderen Akteuren des Parallelsystems. Zum Thema Unversicherte Migranten.                                                                                                                                      |          | x        |
| Restrictive Gatekeeper          | Zugang limitieren, "Missbrauch" verhindern<br>Gatekeeper im Sinne von es bestehen Ressourcen die genutzt werden können, jedoch entscheidet der Gatekeeper darüber wer einen Zugang erhält oder nicht. Hier wurde codiert wenn der Zugang limitiert oder verwehrt wird. Deduktiv                                        |          | x        |
| Pull-Faktor                     | Benennung von Pull-Faktor zur Limitierung von Zugänglichkeit. Deduktiv                                                                                                                                                                                                                                                 |          | x        |
| <b>02.1 EIGENE SERVICES</b>     | Services am Amt, von Amtswegen her; nicht in Trägerschaft                                                                                                                                                                                                                                                              | x        |          |
| Eigenes Psycho-soz Angebot      | Beschreibung von Angeboten mit psychosozialen Schwerpunkt, z.B. Sozialpsychiatrischer Dienst                                                                                                                                                                                                                           |          | x        |
| Fortbildung                     | Benennung zum Aspekt "Fortbildung" im Zusammenhang mit der Arbeit im Parallelsystem (medizinisch und sozial rechtlich)                                                                                                                                                                                                 |          | x        |
| Aufsuchende Arbeit              | Aussagen zu aufsuchender Arbeit                                                                                                                                                                                                                                                                                        |          | x        |
| Finanzierung/Steuerung          | Benennung von Zuwendungsfinanzierungen, Fonds, Lösungen und anderen Finanzierungen durch die Behörde, mit öffentlichen Geldern                                                                                                                                                                                         |          | x        |
| Eigenes Verw Recht Angebot      | Arbeit in der Behörde die sozial verwaltungstechnische Fragestellungen der Zielgruppe bearbeiten<br>- DIFF zu Sozial rechtlich : Sozial Rechtlich im Sinne als Service für die beratende Person, Sozial verwaltungstechnisch im Sinne für die Verwaltung und evtl. gegen das Interesse der Person                      |          | x        |
| Eigenes Sozial Recht Angebot    | Angebote, Beratungsstellen, in der Behörde die sozial rechtliche Fragestellungen der Zielgruppe bearbeiten<br>- DIFF zu Sozial Verwaltungstechnisch : Sozial Rechtlich im Sinne als Service für die beratende Person, Sozial verwaltungstechnisch im Sinne für die Verwaltung und evtl. gegen das Interesse der Person |          | x        |
| Socio legal Clearing            | Clearing, Clearingstelle, tiefgreifende sozialrechtliche Beratung und Vertretung der Klientel zum Erreichen einer Krankenversicherung                                                                                                                                                                                  |          | x        |
| Couns Pregnancy                 | Schwangerschaftsberatung, Schwangerschaftskonfliktberatung                                                                                                                                                                                                                                                             |          | x        |
| Couns IfSG                      | Beratung im Rahmen des Infektionsschutzgesetzes, Beratung zu Infektionserkrankungen                                                                                                                                                                                                                                    |          | x        |
| Eigenes Mediz Angebot           | Bennennung von medizinischen Angeboten/Anlaufstellen die direkt am Amt angesiedelt sind und keine externe Trägerschaft haben                                                                                                                                                                                           |          | x        |
| Birth Programm                  | Geburtenprogramme, primär Absicherung der Geburt, sekundär Schwangerschaftsbetreuung                                                                                                                                                                                                                                   |          | x        |
| Treatm Allgemein                | Behandlung von allgemeinen Erkrankungen, nicht nur IfSG                                                                                                                                                                                                                                                                |          | x        |
| Treatm IfSG                     | Behandlung von Erkrankungen i.R. des IfSG                                                                                                                                                                                                                                                                              |          | x        |
| Diagn Sexualhealth/Gyn          | Diagnostik im Kontext sexueller Gesundheit und Gynäkologie, inkl. Schwangerschaftsbetreuung                                                                                                                                                                                                                            |          | x        |
| Diagn IfSG                      | Diagnostik i.R. des IfSG                                                                                                                                                                                                                                                                                               |          | x        |
| <b>02.2 EXPERTENARBEIT</b>      | Aufgabe des Experten der den Kontakt zu UM herstellt, direkt und indirekt, in der behördlichen Aktivität                                                                                                                                                                                                               | x        |          |
| Rolle UM im Alltag              | Direkter Kontakt mit UM im Alltag, Kontakt mit dem Thema UM im Alltag (z.B. Koordination von Projekten mit UM, Gremium zum Thema UM, Datenarbeit)                                                                                                                                                                      | x        |          |
| Mitarbeit in NGO                | Freistellung eines Mitarbeiters zum praktischen Arbeiten in einer NGO; Mitarbeit in einer NGO als Teil der behördlichen Aufgabe                                                                                                                                                                                        |          | x        |
| Laufbahn                        | Aussagen zu der eigenen Laufbahn<br>- Erfahrungen aus vorheriger Arbeit<br>- Qualifikationen                                                                                                                                                                                                                           | x        |          |
| <b>02.3 NETZWERK</b>            | Indirekte Teilnahme an der Versorgung über Gremien, runde Tische<br>- Benennung Netzwerk, Zusammenarbeit, Gremien, runde Tische<br>- Beschreibung der Zusammenarbeit                                                                                                                                                   | x        |          |
| Interakt Zivil gesellschaftlich | Interaktion mit NGO, Interessengruppen aus der Bevölkerung, Lobby Gruppen für UM                                                                                                                                                                                                                                       | x        |          |
| Incoming                        | Interaktion die nicht Behörde auf NGO auslagern von Services (Subsidiaritätsprinzip) ist.<br>- Gesprächsrunde/Runder Tisch ist eigener Code<br>- z.B. "Zusammenarbeit"                                                                                                                                                 |          | x        |
| Outsourcing (Finanziert)        | Aussagen zu Akteuren im Parallelsystem die vollumfänglich bezahlt tätig werden (Trägerschaft)                                                                                                                                                                                                                          |          | x        |
| Outsourcing (Ehrenamt)          | Aussagen zu Akteuren im Parallelsystem die ehrenamtlich/kostenlos oder teilkompensiert tätig werden                                                                                                                                                                                                                    |          | x        |
| Interakt Gesundheitssystem      | Inkl. Krankenhäuser, Praxen, ohne direkte Anbindung an die Behörde<br>- Ehrenamtliche Arbeit<br>- Kostenvergünstigte Übernahme von Behandlungen<br>- Rechnungsstellung                                                                                                                                                 |          | x        |
| Krankenhäuser                   | Benennung von Krankenhäusern im Parallelsystem                                                                                                                                                                                                                                                                         | x        |          |
| Fachärzte                       | Benennung von Fachärzten im Parallelsystem                                                                                                                                                                                                                                                                             |          | x        |
| Interakt Politik                | Interaktionen mit Entscheidungsträgern                                                                                                                                                                                                                                                                                 |          | x        |

|                                  |                                                                                                                                                                                                                                                                                                                                                     |   |
|----------------------------------|-----------------------------------------------------------------------------------------------------------------------------------------------------------------------------------------------------------------------------------------------------------------------------------------------------------------------------------------------------|---|
| Arbeit mit Politik               | Arbeit für Politik, z.B. Beschlüsse schreiben, Sachstandsberichte                                                                                                                                                                                                                                                                                   | x |
| Auftrag                          | Aussagen zum Auftrag der behördlichen Arbeit (rechtlich, hierarchisch)                                                                                                                                                                                                                                                                              | x |
| Interakt Behörde, andere         | Anbindung mit anderen Behörden                                                                                                                                                                                                                                                                                                                      | x |
| Konflikt                         | Konflikte in der Zusammenarbeit mit anderen Behörden                                                                                                                                                                                                                                                                                                | x |
| Kooperativ                       | Kooperation/Kooperative Zusammenarbeit mit anderen Behörden                                                                                                                                                                                                                                                                                         | x |
| <b>3 VERSORGUNGSSITUATION</b>    |                                                                                                                                                                                                                                                                                                                                                     | x |
|                                  | Alle Aussagen bzgl. der gesundheitlichen Versorgungssituation von unversicherten Migranten lokal und deutschlandweit, Gesundheitsstatus und Zugangsbarrieren                                                                                                                                                                                        |   |
| Prävention                       |                                                                                                                                                                                                                                                                                                                                                     | x |
| Impfen                           | Aussagen zu Impfungen im Parallelsystem                                                                                                                                                                                                                                                                                                             | x |
| Krankheit                        |                                                                                                                                                                                                                                                                                                                                                     | x |
| Infektionskrankheit              | Aussagen zu Infektionskrankheiten<br>- Hierzu zählen alle Angebote im Rahmen des IfSG                                                                                                                                                                                                                                                               | x |
| Hepatitis                        | Aussagen zu Hepatitis                                                                                                                                                                                                                                                                                                                               | x |
| HIV                              | Aussagen zu HIV                                                                                                                                                                                                                                                                                                                                     | x |
| Tbc                              | Aussagen zu Tuberkulose                                                                                                                                                                                                                                                                                                                             | x |
| STI                              | Aussagen zu anderen STI                                                                                                                                                                                                                                                                                                                             | x |
| Stationäre Bedarfe/Teure Bedarfe | Benennung von stationären Bedarfen<br>- Beschreibung des Umgangs mit stationären Bedarfen                                                                                                                                                                                                                                                           | x |
| Ambulante Bedarfe                | Beschreibung von Ambulanten Bedarfen<br>- Benennung, Aspekte des Umgangs mit diesen Bedarfen                                                                                                                                                                                                                                                        | x |
| Gynäkologie                      | Aussagen zu Frauengesundheit<br>- reproduktive Gesundheit<br>- Abtreibungen<br>- Krebsvorsorge<br><br>Benennung von Versorgern von Frauengesundheit<br><br>Nicht STI, HIV, Tbc                                                                                                                                                                      | x |
| Chronische Erkrankungen          | Aussagen zu chronischen Erkrankungen im Versorgungssetting<br>- inkl. Infektionskrankheiten die langfristige Behandlungen brauchen<br>- inkl. nicht übertragbare Erkrankungen (z.B. Diabetes)                                                                                                                                                       | x |
| Onkologische Erkrankung          | Aussagen zu onkologischen Erkrankungen<br>" Krebs", "Myome"                                                                                                                                                                                                                                                                                         | x |
| Psychologisch                    | Aussagen zu Psychosozialen Angeboten<br>- Sozialpsychiatrischer Dienst<br>- Psychische Gesundheit<br>- Diff zu Suchterkrankungen als eigene Kategorie                                                                                                                                                                                               | x |
| Suchterkrankung                  | Aussagen zu Sucherkrankten und Menschen/Migranten mit Suchterkrankung<br>Aussagen zu Suchterkrankungen im Versorgungssystem                                                                                                                                                                                                                         | x |
| Herausforderung/Limit Status Quo | Beispiel einer nicht lösbaren Aufgabe, reell/hypothetisch<br>Nennung von Herausforderungen in der Arbeit der gesundheitsversorgung von unversicherten Migranten, inkl. sozial rechtliche Aspekte<br>Nennung von Herausforderungen für die Zielgruppe bzgl. gesundheitlichen Bedarfen<br>Nennung von persönlichen Herausforderungen für die Experten | x |
| Nichtregierungs Organisation     | Aussagen zu NGO Tätigkeiten im Versorgungssetting<br>- Interaktion mit NGOs im Versorgungssetting<br>- Nennung von NGOs im Versorgungssetting                                                                                                                                                                                                       | x |
| Versorgungssetting vor Ort       | Beschreibung der VS vor Ort                                                                                                                                                                                                                                                                                                                         | x |
| "Bedingt positiv"                | Beschreibung der Versorgungssituation vor Ort als "bedingt positiv" oder teilweise ausreichend oder eine andere Aussage zu einem teilkompensierten Care Setting aus Sicht der Experten                                                                                                                                                              | x |
| "Makeshift Solutions"            | Lösungen zu Herausforderungen durch Behilfskonstrukte, z.B. Remigration statt Inanspruchnahme von Leistungen in Deutschland. "Makeshift" Lösungen funktionieren nur im Einzelfall, sind keine langfristige Lösung.                                                                                                                                  | x |
| Entwicklung VS                   | Beschreibung eines Vorgangs der zu der Angebotsentwicklung beigetragen hat<br>- Wunsch oder Vorhaben einer Entwicklung des Angebots<br>- Dynamiken/Anpassung in der Vergangenheit zur Entwicklung des Angebots                                                                                                                                      | x |
| Clearing                         | Alle Aussagen zu Clearingstellen im Sinne einer sozialrechtlichen Klärungsstelle für unversicherte, nicht in Bezug auf einen EIGENEN SERVICE<br>- Aussagen zum Clearing als sozialrechtliche Klärung eines möglichen Zugangs zum Regelsystem, auch wenn keine spezifische Clearingstelle beteiligt ist                                              | x |
| Gesundheitsstatus                | Aussagen zu Gesundheitsstatus der Zielgruppe                                                                                                                                                                                                                                                                                                        | x |

|                                  |                                                                                                                                                                                                                                                                                                                                                 |   |   |
|----------------------------------|-------------------------------------------------------------------------------------------------------------------------------------------------------------------------------------------------------------------------------------------------------------------------------------------------------------------------------------------------|---|---|
| Zugangsbarrieren                 | Aussagen zu Zugangsbarrieren der Zielgruppe zu medizinischen Hilfen<br>- im Parallelsystem, sowie auch Regelsystem<br>- Beschreibung von Annahmen zu Zugangsbarrieren in Behörden für die Zielgruppe                                                                                                                                            | x |   |
| Institutionell                   |                                                                                                                                                                                                                                                                                                                                                 |   | x |
| Rechtlich                        |                                                                                                                                                                                                                                                                                                                                                 |   | x |
| Oekonomisch                      |                                                                                                                                                                                                                                                                                                                                                 |   | x |
| <b>4 MONITORING</b>              | Alle Aussagen bzgl. Daten und Datenarbeit im Zusammenhang mit unversicherten Migranten<br>(Behörde, andere Stellen, deutschlandweit)                                                                                                                                                                                                            | x |   |
| Grundeinschätzung                | Allgemeine äusserungen zum Monitoring, positive oder negative Meinung<br>- Sammelcode für nicht weiter spezifizierte äusserungen                                                                                                                                                                                                                | x |   |
| Implementierung                  | Alle Aussagen zu Anforderungen, Erfahrungen und Empfehlungen bzgl. eines Versuchs einer Implementierung eines Monitorings                                                                                                                                                                                                                       | x |   |
| Umsetzbarkeit                    | Aussagen zur Einschätzung wie eine Implementierung sein müsste, d.h. inhaltliche und institutionelle Anforderungen.<br><br>Diff zu Einsetzbarkeit : Dies sind Aussagen die das WO einer Implementierung betreffen                                                                                                                               | x |   |
| Einsatzbarkeit                   | Aussagen zur Einschätzung wo und ob eine Erhebung in der befragten Behörde Sinn macht, oder Aussage zu Einschätzung WO noch es sinnvoll wäre<br><br>Diff zu Umsetzbarkeit : Dies sind Aussagen die das WIE einer Implementierung betreffen<br>- z.B. Anregungen geben was berücksichtigt werden muss, jedoch nicht nur den Einsatzort benennen. | x |   |
| Item                             | Aussage zu einem speziellen Item auf dem Erhebungsbogen<br>Ersetzt den Code Einsetzbarkeit und Umfang wenn diese sich auf speziell ein Item beziehen<br>Aussagen zu einem fehlenden Item                                                                                                                                                        | x |   |
| Unique Identifier                | : Aussagen zu einem Unique Identifier System, zu der Nachverfolgbarkeit einer Person im Parallelsystem                                                                                                                                                                                                                                          |   | x |
| Verwendung                       | Aussagen zu Verwendung eines Monitorings<br>- reale und hypotetische                                                                                                                                                                                                                                                                            | x |   |
| Lobbying                         | Code : Behörde als Lobbying Organ                                                                                                                                                                                                                                                                                                               |   | x |
| Wissen                           | Sammelcode zu Aussagen zu aktuellem Wissenstand zur Zielgruppe durch statistische Erfassung<br>- Wissen von anderen organisationen, auch Fallbeispiele<br>- Eigene Datenerhebung<br>- Andere Berichterstattung<br>- Wissenslücken                                                                                                               | x |   |
| Wissensbenennung Inhalt          | Inhaltliche Aussagen aus einer Datenerhebung in der Behörde oder einer anderen Quelle<br>- Benennung von Wissenslücken                                                                                                                                                                                                                          | x |   |
| Wissenslücke                     | Benennung von expliziten Wissenslücken                                                                                                                                                                                                                                                                                                          |   | x |
| Art Wissensquelle ( quanti/qual) | Benennung von dem Wissenstypus qualitative oder quantitative Daten in Bezug auf eine Wissensquelle                                                                                                                                                                                                                                              |   | x |
| Wissensquelle in der Behörde     | Aussagen zu Datenerhebungen in der Behörde oder durch behördliche Arbeit                                                                                                                                                                                                                                                                        | x |   |
| Wissensquelle andere als Behörde | Benennung von Wissensquellen ausserhalb der Behörde (z.B. NGO)                                                                                                                                                                                                                                                                                  |   | x |
| Berichterstattung                | Berichterstattung der Behörde<br>- Berichte für Politik, Sachstandsberichte, Verwendungsnachweise, wissenschaftliche Publikationen                                                                                                                                                                                                              | x |   |
